# Supplementary material for: Association between Giardia duodenalis and Coinfection with Other Diarrhea-Causing Pathogens in India
Source: Hindawi journal article supplement (doi:10.1155/2014/786480), 2014-01-01
Supplement: f1 [file 786480.f1.pdf]

Current Data Source: C:\Users\Avik\Desktop\Giardia Surv Paper\Epiinfo Giardia  
surv.xls:Sheet1\$

Record Count: 15 (Deleted Records Excluded) Date: 12-12-2013 17:03:25

## REGRESS PER\_Giardia = ACT\_RAIN

---

### Linear Regression

| Variable | Coefficient | Std Error | F-test  | P-Value  |
|----------|-------------|-----------|---------|----------|
| ACT_RAIN | 0.000       | 0.002     | 0.0074  | 0.932738 |
| CONSTANT | 9.508       | 0.986     | 92.9913 | 0.000000 |

Correlation Coefficient:  $r^2 = 0.00$

| Source     | df | Sum of Squares | Mean Square | F-statistic |
|------------|----|----------------|-------------|-------------|
| Regression | 1  | 0.066          | 0.066       | 0.007       |
| Residuals  | 13 | 115.881        | 8.914       |             |
| Total      | 14 | 115.947        |             |             |

## REGRESS DIARRHEA = ACT\_RAIN

---

### Linear Regression

| Variable | Coefficient | Std Error | F-test  | P-Value  |
|----------|-------------|-----------|---------|----------|
| ACT_RAIN | 0.014       | 0.020     | 0.5292  | 0.479835 |
| CONSTANT | 65.911      | 11.816    | 31.1160 | 0.000089 |

**Correlation Coefficient:  $r^2 = 0.04$**

| Source     | df | Sum of Squares | Mean Square | F-statistic |
|------------|----|----------------|-------------|-------------|
| Regression | 1  | 677.513        | 677.513     | 0.529       |
| Residuals  | 13 | 16642.976      | 1280.229    |             |
| Total      | 14 | 17320.489      |             |             |

---

---

| WRITE       |                                                                                                                        |
|-------------|------------------------------------------------------------------------------------------------------------------------|
| COMMANDNAME | WRITE                                                                                                                  |
| WRITEMODE   | APPEND                                                                                                                 |
| OUTTARGET   | Provider=Microsoft.Jet.OLEDB.4.0;Data Source="C:\Users\Avik\Desktop\Giardia Surv Paper\Mixed assocn data.mdb":Programs |
| STATUS      | Export completed successfully, 15 records written.                                                                     |

```
READ {C:\Users\Avik\Desktop\Giardia Surv Paper\Epiinfo Giardia
surv.xls}: [Sheet1$]
REGRESS PER Giardia=ACT_RAIN
REGRESS DIARRHEA=ACT_RAIN
WRITE APPEND "Epi7" {Provider=Microsoft.Jet.OLEDB.4.0;Data
Source="C:\Users\Avik\Desktop\Giardia Surv Paper\Mixed assocn data.mdb"} :
Programs *
```

**REGRESS Total = VC**

---

### Linear Regression

| Variable | Coefficient | Std Error | F-test   | P-Value  |
|----------|-------------|-----------|----------|----------|
| VC       | 1.565       | 0.131     | 141.7082 | 0.000000 |
| CONSTANT | 3.714       | 0.538     | 47.6870  | 0.000000 |

**Correlation Coefficient:  $r^2 = 0.72$**

| Source     | df | Sum of Squares | Mean Square | F-statistic |
|------------|----|----------------|-------------|-------------|
| Regression | 1  | 1544.551       | 1544.551    | 141.708     |
| Residuals  | 54 | 588.574        | 10.900      |             |
| Total      | 55 | 2133.125       |             |             |

**REGRESS Total = ROTA**

---

#### **Linear Regression**

| Variable | Coefficient | Std Error | F-test  | P-Value  |
|----------|-------------|-----------|---------|----------|
| ROTA     | 1.796       | 0.361     | 24.7647 | 0.000007 |
| CONSTANT | 4.681       | 0.881     | 28.2220 | 0.000002 |

**Correlation Coefficient:  $r^2 = 0.31$**

| Source     | df | Sum of Squares | Mean Square | F-statistic |
|------------|----|----------------|-------------|-------------|
| Regression | 1  | 670.684        | 670.684     | 24.765      |
| Residuals  | 54 | 1462.441       | 27.082      |             |
| Total      | 55 | 2133.125       |             |             |

**REGRESS Total = TOTDIARRHEA**

---

#### **Linear Regression**

| Variable    | Coefficient | Std Error | F-test   | P-Value  |
|-------------|-------------|-----------|----------|----------|
| TOTDIARRHEA | 0.133       | 0.013     | 110.4603 | 0.000000 |
| CONSTANT    | -2.238      | 1.034     | 4.6892   | 0.034788 |

**Correlation Coefficient:  $r^2 = 0.67$**

| Source     | df | Sum of Squares | Mean Square | F-statistic |
|------------|----|----------------|-------------|-------------|
| Regression | 1  | 1432.720       | 1432.720    | 110.460     |
| Residuals  | 54 | 700.405        | 12.970      |             |
| Total      | 55 | 2133.125       |             |             |

```

REGRESS PER_Giardia=ACT_RAIN
REGRESS DIARRHEA=ACT_RAIN
WRITE APPEND "Epi7" {Provider=Microsoft.Jet.OLEDB.4.0;Data
Source="C:\Users\Avik\Desktop\Giardia Surv Paper\Mixed assocn data.mdb"} :
Programs *
READ {C:\Users\Avik\Desktop\Giardia Surv Paper\Epiinfo Giardia
surv.xls}:[Sheet2$]
REGRESS PERTotal=PERVC
REGRESS Total=VC

LIST * GRIDTABLE
REGRESS Total=ROTA
REGRESS Total=TOTDIARRHEA

```
